# Supplementary material for: A randomised controlled trial and cost-consequence analysis of traditional and digital foot orthoses supply chains in a National Health Service setting: application to feet at risk of diabetic plantar ulceration
Source: J Foot Ankle Res. 2019 Jan 8;12:2. doi: 10.1186/s13047-018-0311-0 (PMC6325812; doi:10.1186/s13047-018-0311-0)
Supplement: Supplementary file 2 — Client Service Receipt Inventory, this document demonstrates the format for collection of health service use data within this study. (PDF 394 kb) [file 13047_2018_311_MOESM2_ESM.pdf]

**Telephone Review 1 - Service Use Receipt**

Interviewer instructions: **Please complete all sections** of the table to show the services that the participant has used **since the screening appointment**.

|                                 |   |   |   |   |   |   |   |   |   |   |
|---------------------------------|---|---|---|---|---|---|---|---|---|---|
| <b>Patient Identity Number:</b> | 0 | 0 | 0 | 0 | 0 | 0 | 0 | 0 | 0 | 1 |
| <b><u>Date of Visit:</u></b>    |   |   |   |   |   |   |   |   |   |   |

1 Community Based Service Use

**Date of Visit:** \_\_\_\_\_

1 Community Based Service Use

[illegible]

## 2 Out-Patient Care Service Use

[illegible]

|   |                                    |
|---|------------------------------------|
| 3 | <u>In-Patient Care Service Use</u> |
|---|------------------------------------|

[illegible]
